# Supplementary material for: Melanoma-associated mutants within the serine-rich domain of PAK5 direct kinase activity to mitogenic pathways
Source: PubMed Central journal article supplement (PMC5986637; doi:10.18632/oncotarget.25356), 2018-05-22
Supplement: oncotarget-09-25386-s001.pdf [file oncotarget-09-25386-s001.pdf]

## Melanoma-associated mutants within the serine-rich domain of PAK5 direct kinase activity to mitogenic pathways

### SUPPLEMENTARY MATERIALS AND METHODS

#### Manufacturing of microfluidic devices used for migration assays

hMELT stable cell lines were analyzed for migratory defects using a custom Bi-directional Migration Assay (BMA) and time-lapse microscopy (Fig 3A). The BMA has an array of parallel aligned microtracks which were fabricated out of polydimethylsiloxane (PDMS) using standard photo- and soft-lithography [1]. Briefly, silicon wafers were piranha cleaned and then spin coated with SU-8 2025 (MicroChem). The spin coated wafers were then soft baked on a hot plate at 65°C for 1 minute followed by 2 minute heating at 95°C. The silicon wafer was then exposed to high intensity UV through a transparency mask thereby transferring the final pattern onto the wafers. The exposed wafer was then hard-baked at 65°C for 1 minute followed by 95°C bake for 3 minutes. Wafers were then treated in an SU-8 developer leaving behind the negative pattern of the final design onto the wafer. Finally, the wafers were hard baked at 200°C for 2 minutes. All the silicon wafer processing till this point was done in class 100 cleanroom. The Silicon wafers were silanized (T2492-KG, UCT Specialties) to passivate the wafers from sticking to PDMS. For replica molding final PDMS devices, a 10:1 mixture of elastomer to cross-linking agent (Slygard 184® Silicone Elastomer Kit, Dow Corning) was mixed, desiccated and then poured onto the silicon masters. The silicone mixture was cured at 65°C in a convection oven for 2 hours. The cured PDMS with the final patterned devices were then cut out from wafers and irreversibly plasma bonded to PDMS coated cell culture grade 6 well plates. The plates were sterilized for 60 minutes under high intensity UV making them suitable for cell culture experiments.

**A**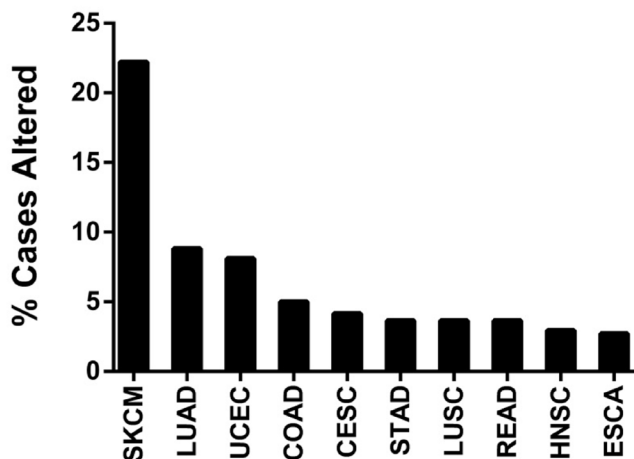**B**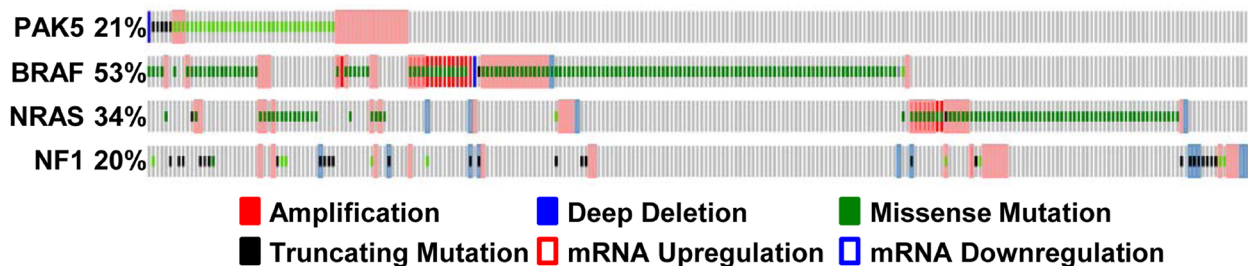**C**

| Gene #1     | Gene #2     | p-value          | Log odds ratio | Relationship            |
|-------------|-------------|------------------|----------------|-------------------------|
| <b>PAK5</b> | <b>NF1</b>  | <b>0.005</b>     | <b>0.913</b>   | <b>Co-occurrence</b>    |
| PAK5        | BRAF        | 0.195            | 0.294          |                         |
| PAK5        | NRAS        | 0.303            | 0.198          |                         |
| <b>BRAF</b> | <b>NRAS</b> | <b>&lt;0.001</b> | <b>-2.226</b>  | <b>Mutual exclusive</b> |
| <b>BRAF</b> | <b>NF1</b>  | <b>&lt;0.001</b> | <b>-1.027</b>  | <b>Mutual exclusive</b> |
| NRAS        | NF1         | 0.171            | 0.335          |                         |

**D**

| Gene #1     | Gene #2     | p-value      | Log odds ratio | Relationship         |
|-------------|-------------|--------------|----------------|----------------------|
| PAK5        | PAK1        | 0.428        | -0.238         |                      |
| PAK5        | PAK2        | 0.058        | -1.046         |                      |
| <b>PAK5</b> | <b>PAK3</b> | <b>0.024</b> | <b>1.042</b>   | <b>Co-occurrence</b> |
| PAK5        | PAK4        | 0.329        | 0.380          |                      |
| PAK5        | PAK6        | 0.402        | 0.232          |                      |

**Supplementary Figure 1: PAK5 alterations are prevalent in melanoma and co-occur with alterations in NF1.** **A.** The frequency of *PAK5* alterations in multiple TCGA tumor datasets analyzed using the NCI GDC Data Portal. SKCM = skin cutaneous melanoma, LUAD = lung adenocarcinoma, UCEC = uterine corpus endometrial carcinoma, COAD = colon adenocarcinoma, CESC = cervical squamous cell carcinoma and endocervical adenocarcinoma, STAD = stomach adenocarcinoma, LUSC= lung squamous cell carcinoma, READ = rectum adenocarcinoma, HNSC = head and neck squamous cell carcinoma, ESCA = esophageal carcinoma. **B.** cBioportal Oncoprint, generated from the TCGA dataset, depicting the co-occurrence of *PAK5* alterations with *BRAF*-, *NRAS*- and *NF1*-alterations in human melanoma. **C.** Results from Fisher's Exact tests assessing the co-occurrence and/or mutual exclusivity between *PAK5*, *BRAF*, *NRAS* and *NF1* alterations in melanoma. Bolded values are statistically significant. **D.** Results from Fisher's Exact tests assessing the co-occurrence and/or mutual exclusivity between *PAK* gene alterations in melanoma. Bolded values are statically significant.

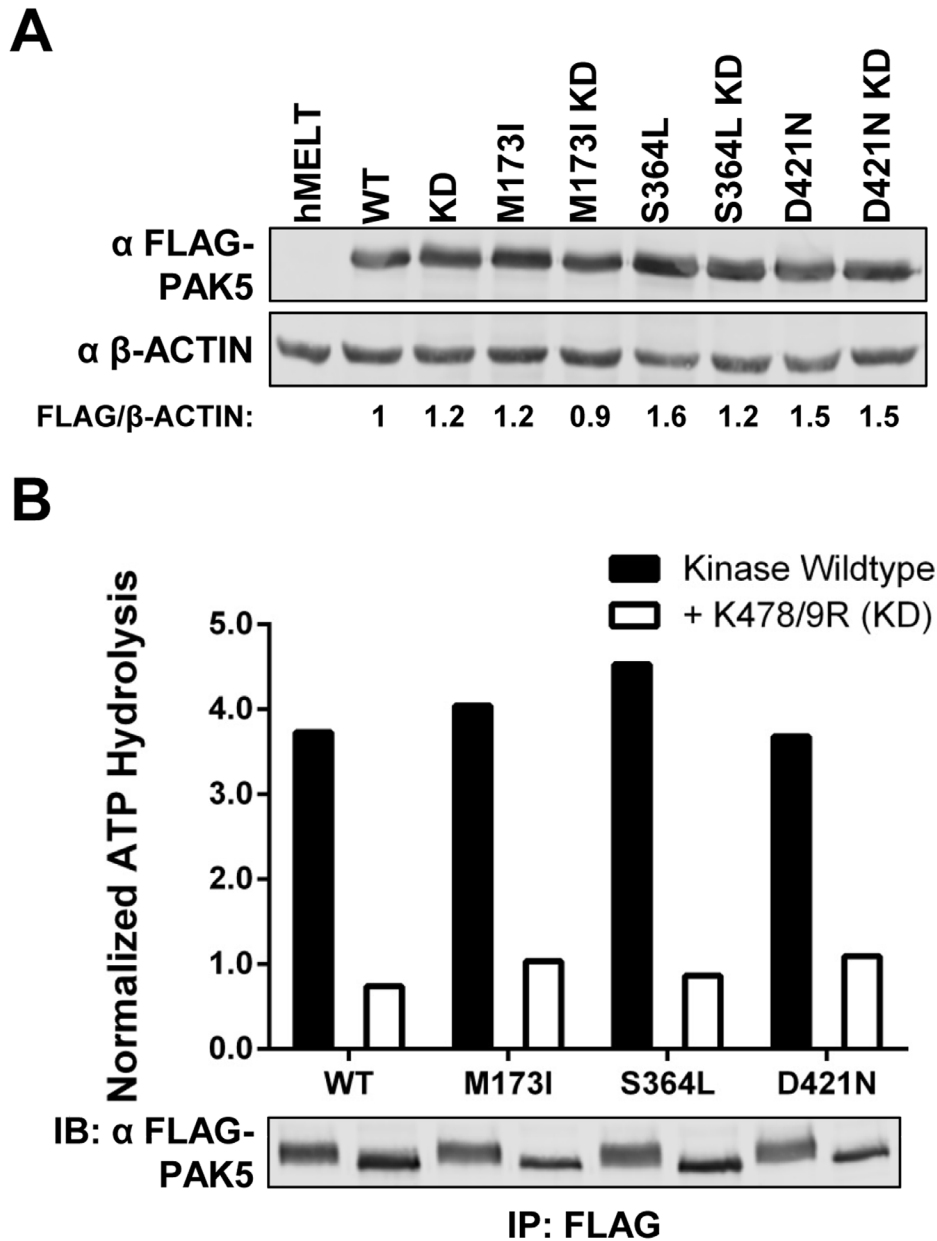

**Supplementary Figure 2: Validation of kinase dead melanoma-associated PAK5 mutants.** **A.** Immunoblots depicting the stable expression of FLAG-tagged wildtype and kinase dead (KD) PAK5 variants in hMELTs. ‘hMELT’ indicates the parental cell line. Shown below each lane is the β-ACTIN-normalized level of mutant PAK5 expression relative to wildtype (WT) PAK5. **B.** PAK5 kinase activity was measured using the ADP-Glo (Promega) system and normalized to immunoprecipitated protein levels as measured by immunoblot. Shown below is an immunoblot of immunoprecipitated FLAG-PAK5 samples used in the kinase assay.

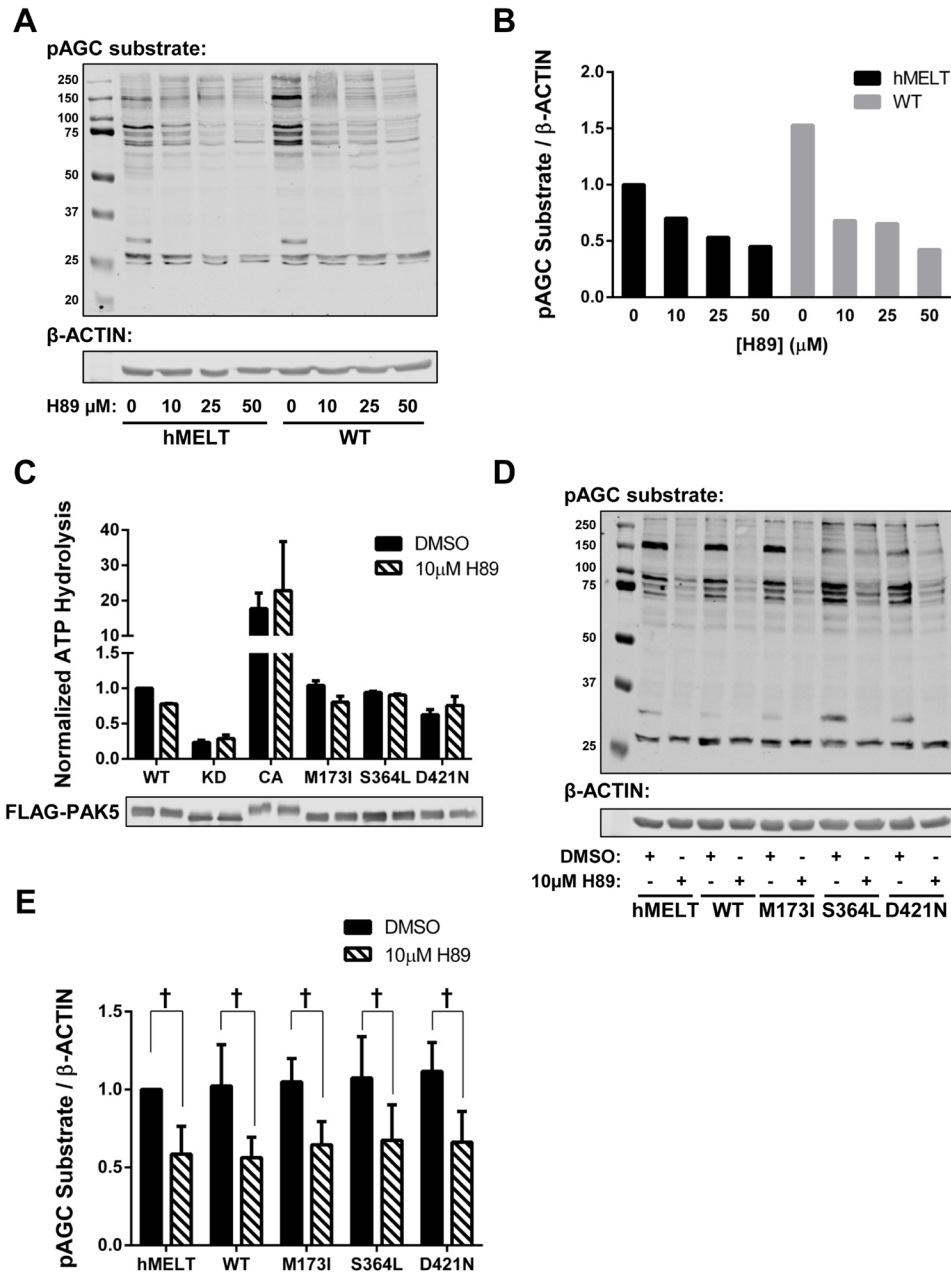

**Supplementary Figure 3: H9 inhibits PKA signaling in hMELT stable cell lines.** **A.** hMELT stable cell lines were placed in 2% serum for 18 hours and then treated with DMSO or increasing amounts of H89 for 8.5 hours. Lysates were then analyzed by SDS-PAGE followed by immunoblotting with an antibody that recognizes the phosphorylated motif of AGC kinases. ‘hMELT’ indicates the parental cell line. **B.** Quantification of each lane from the immunoblot represented in ‘A’ where values indicate the  $\beta$ -ACTIN-normalized, phosphorylated substrates of AGC kinases. **C.** hMELT stable cell lines were starved of serum and growth factors for 18 hours and then treated with DMSO or 10  $\mu$ M H89 for 8.5 hours. PAK5 kinase activity was measured using the ADP-Glo (Promega) system and normalized to immunoprecipitated protein levels as measured by immunoblot. Shown below is a representative immunoblot of immunoprecipitated FLAG-PAK5 samples used in the kinase assay. Each bar represents the mean with error bars indicating the range. **D.** hMELT stable cell lines were incubated in 2% serum for 18 hours and then treated with DMSO or 10  $\mu$ M H89 for 8.5 hours. Lysates were then analyzed by SDS-PAGE followed by immunoblotting for phosphorylated substrates of AGC kinases. ‘hMELT’ indicates the parental cell line. **E.** Quantification of each lane from the immunoblots represented in ‘D’ where values indicate the average signal of phosphorylated substrates of AGC kinases, normalized to  $\beta$ -ACTIN and relative to parental hMELT cells across at least three biological replicates. Error bars represent the standard deviation. † =  $p < 0.05$  compared to each respective DMSO control.  $p$ -values were calculated using multiple t-tests and significance determined by FDR (Q=5%).

**Supplementary Table 1: List of antibodies used in the study**

| <b>Antibody</b>        | <b>Company</b>              | <b>Cat. #</b> | <b>Dilution</b> |
|------------------------|-----------------------------|---------------|-----------------|
| $\beta$ -ACTIN         | Cell Signaling Technologies | 3700          | 1:5000          |
| BRAF                   | Santa Cruz                  | sc-5284       | 1:1000          |
| BRAF-pS445             | Cell Signaling Technologies | 2696          | 1:1000          |
| CRAF                   | BD Biosciences              | 610151        | 1:1000          |
| CRAF-pS338             | Cell Signaling Technologies | 9427          | 1:1000          |
| ERK                    | Cell Signaling Technologies | 4696          | 1:1000          |
| ERK-pT202/Y204         | Cell Signaling Technologies | 4370          | 1:1000          |
| FLAG                   | Sigma                       | F1804         | 1:1000          |
| MEK1/2                 | Cell Signaling Technologies | 9122          | 1:1000          |
| MEK-pS217/221          | Cell Signaling Technologies | 9121          | 1:1000          |
| PAK5                   | R&D Biosystems              | MAB4696       | 1:1000          |
| PKA-pSer/Thr Substrate | Cell Signaling Technologies | 9621          | 1:1000          |
